# Supplementary material for: The Plastisphere – Uncovering tightly attached plastic “specific” microorganisms
Source: PubMed Central journal article supplement (PMC6478340; doi:10.1371/journal.pone.0215859), 2019-04-23

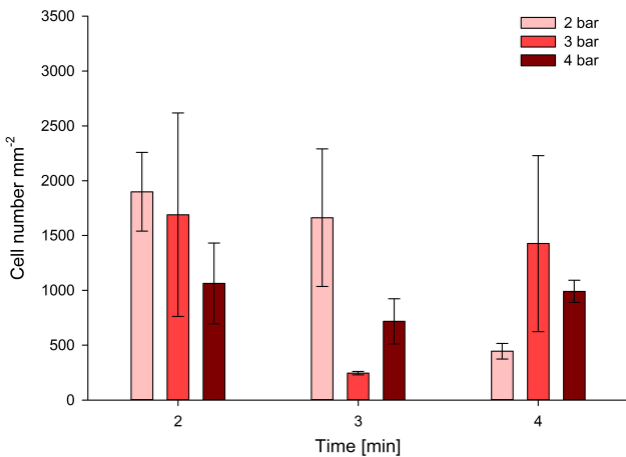

Supplement: pone.0215859.s002.pdf [file pone.0215859.s002.pdf]
