# Supplementary material for: The Plastisphere – Uncovering tightly attached plastic “specific” microorganisms
Source: PLoS One. 2019 Apr 23;14(4):e0215859. doi: 10.1371/journal.pone.0215859 (PMC6478340; doi:10.1371/journal.pone.0215859)
Supplement: S4 Table — P-values were obtained using type III sums and 9999 permutations under the full model. d.f.: degrees of freedom, SS: sums of squares; MS: mean squares, perms: number of unique permutations per comparison. Significant results (p (perm) < 0.05) are highlighted in bold. (XLSX) [file pone.0215859.s008.xlsx]

## Sheet: Table S4
Table S4 PERMANOVA main tests of biofilm community on different re-colonized synthetic polymers and glass based on Hellinger distance of operational taxonomic units (OUTs). P-values were obtained using type III sums and 9999 permutations under the full model. d.f.: degrees of freedom, SS: sums of squares; MS: mean squares, perms: number of unique permutations per comparison. Significant results (…
Source of variation	d.f.	SS	MS	Pseudo-F	p (perm)1	perms
Substrate	9	16945	18827	56281	0.0001	9847
Res	40	13381	0.0335
Total	49	18283
